# Supplementary material for: lncRNA GAS5 Reverses EMT and Tumor Stem Cell-Mediated Gemcitabine Resistance and Metastasis by Targeting miR-221/SOCS3 in Pancreatic Cancer
Source: PubMed Central journal article supplement — Mol Ther Nucleic Acids. 2018 Oct 6;13:472–82. doi: 10.1016/j.omtn.2018.09.026 (PMC6205337; doi:10.1016/j.omtn.2018.09.026), 2018-10-06

OMTN, Volume 13

## **Supplemental Information**

### **lncRNA GAS5 Reverses EMT and Tumor Stem Cell-Mediated Gemcitabine Resistance and Metastasis by Targeting miR-221/SOCS3 in Pancreatic Cancer**

**Bingyan Liu, Shaoqiu Wu, Jun Ma, Shuo Yan, Zhengguang Xiao, Linhuang Wan, Feng Zhang, Mingyi Shang, and Aiwu Mao**

Supplemental. 1

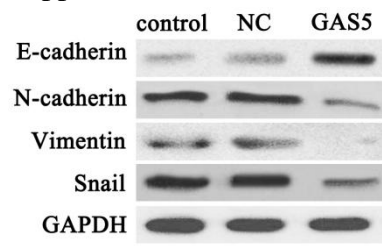

Supplemental. 2

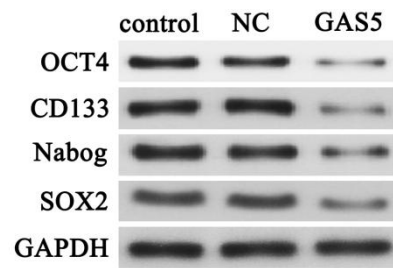

Supplement: mmc1.pdf [file mmc1.pdf]
